# Supplementary material for: Flexible metal nanowire-parylene C transparent electrodes for next generation optoelectronic devices
Source: Royal Society of Chemistry journal article supplement (doi:10.1039/c6tc05619a), 2017-01-01
Supplement: c6tc05619a1.pdf [file c6tc05619a1.pdf]

**Supplementary Information**

**Flexible Metal Nanowire-Parylene C Transparent Electrodes for Next  
Generation Optoelectronic Devices**

Yumi Ahn,<sup>a</sup> Donghwa Lee,<sup>a</sup> Youngjun Jeong,<sup>a</sup> Hyungjin Lee,<sup>a</sup> and Youngu Lee<sup>\*, a</sup>

<sup>a</sup> Department of Energy Systems Engineering, Daegu Gyeongbuk Institute of Science and Technology  
(DGIST), 333, Techno jungang-daero, Hyeonpung-Myeon, Dalseong-Gun, Daegu, 42988, Republic of  
Korea

\*E-mail : youngulee@dgist.ac.kr

## Measurement and characteristics

A parylene C protection layer was deposited by pyrolytic deposition system (NURI TECH, NRPC-500). A UV/Vis/NIR spectrophotometer (Agilent, Cary-4000) was used to measure the optical transmittance of metal NW and metal NW-Parylene C films. The sheet resistances were measured using a non-contact sheet measurement instrument (NAPSON corp., EC-80). Scanning electron microscope (HITACH S-4800) was used to investigate the surface of metal NW and metal NW-Parylene C TEs. The Raman spectra of both samples were measured using a Raman spectrometer (Almega XR, Thermo scientific). The surface morphology of the metal NW and metal NW-Parylene C TEs was measured using Atomic Force Microscope (NX10, Park systems). The haze was measured with Nippon Denshoku haze meter (COH-400). Mechanical flexibility tests of AgNW-parylene C/PET and ITO/PET TEs were performed using a bending tester (ZBT-200, Z-tec). The current density - voltage (J-V) measurements of organic solar cell devices were performed using a solar simulator (Mcscience Inc., K-3300) under AM 1.5 G illuminations ( $100 \text{ mW cm}^{-2}$ ). All measurements were carried out under ambient conditions at room temperature.

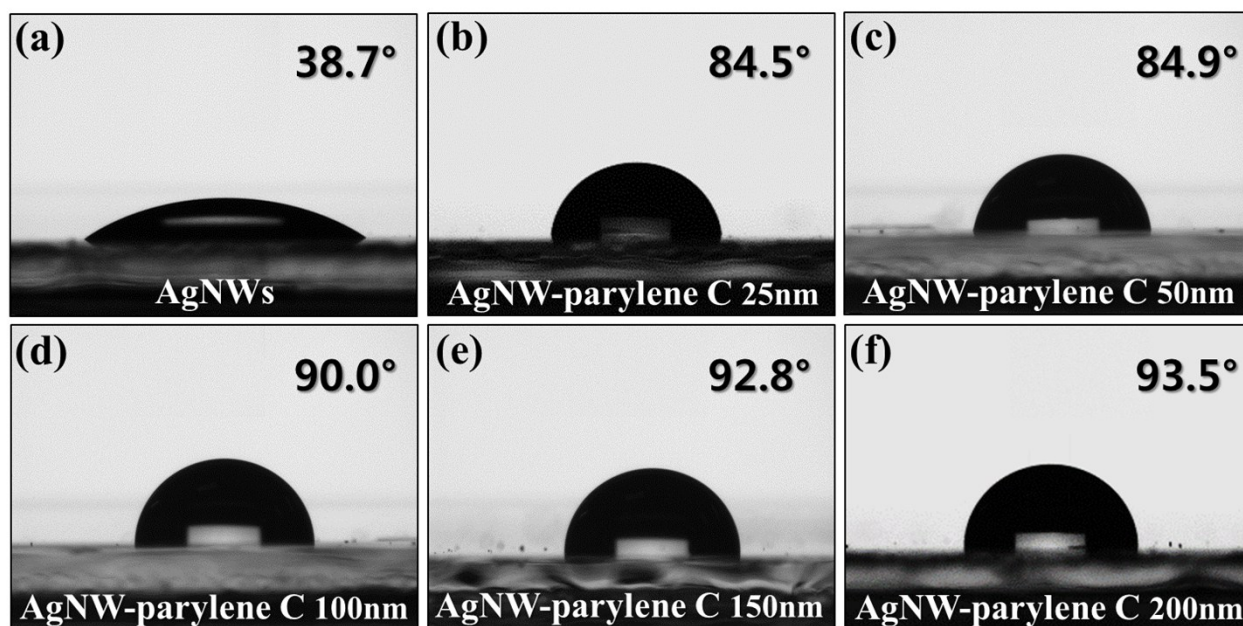

**Fig. S1** Contact angle measurements of (a) the AgNW and AgNW-parylene C TEs with (b) 25nm, (c) 50nm, (d) 100nm, (e) 150nm, (f) 200nm parylene C layers using deionized water droplet.

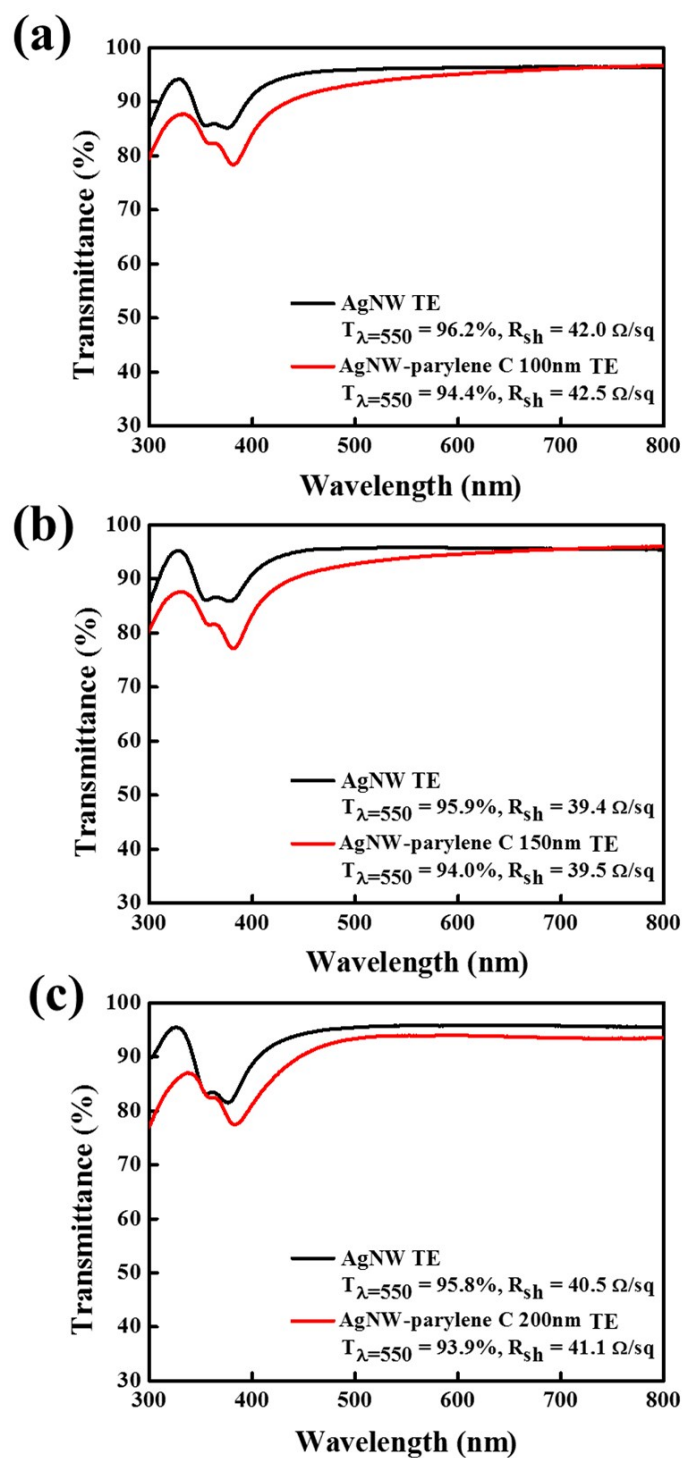

**Fig. S2** Optical transmittance spectra and sheet resistances of AgNW-parylene C TEs with various thickness of parylene C layers (a) 100nm, (b) 150nm, (c) 200nm.

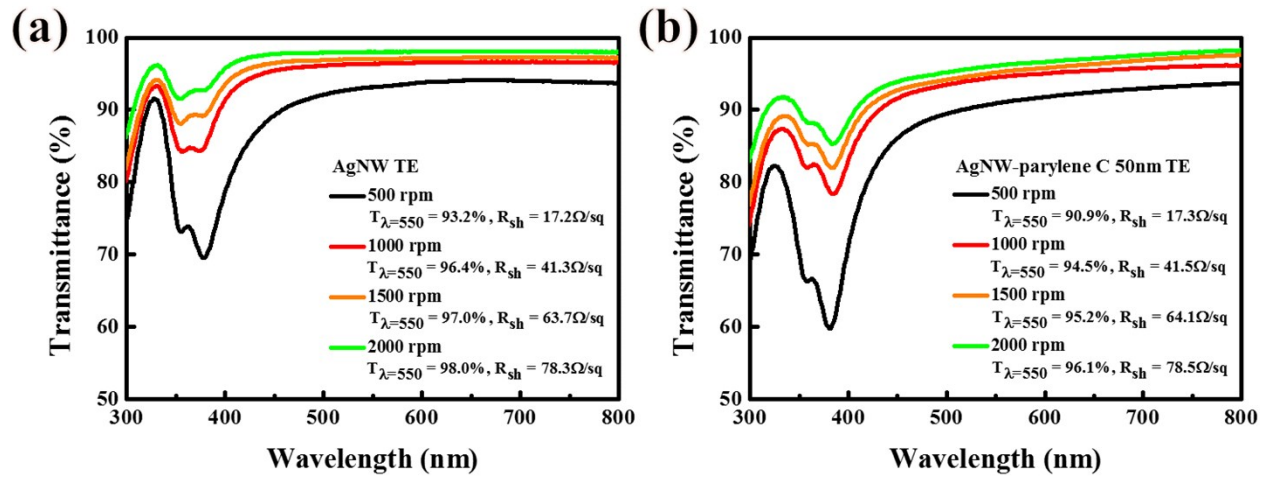

**Fig. S3** Optical transmittance spectra and sheet resistances of AgNW and AgNW-parylene C TEs with the spin coating speed from 500 rpm to 2000 rpm.

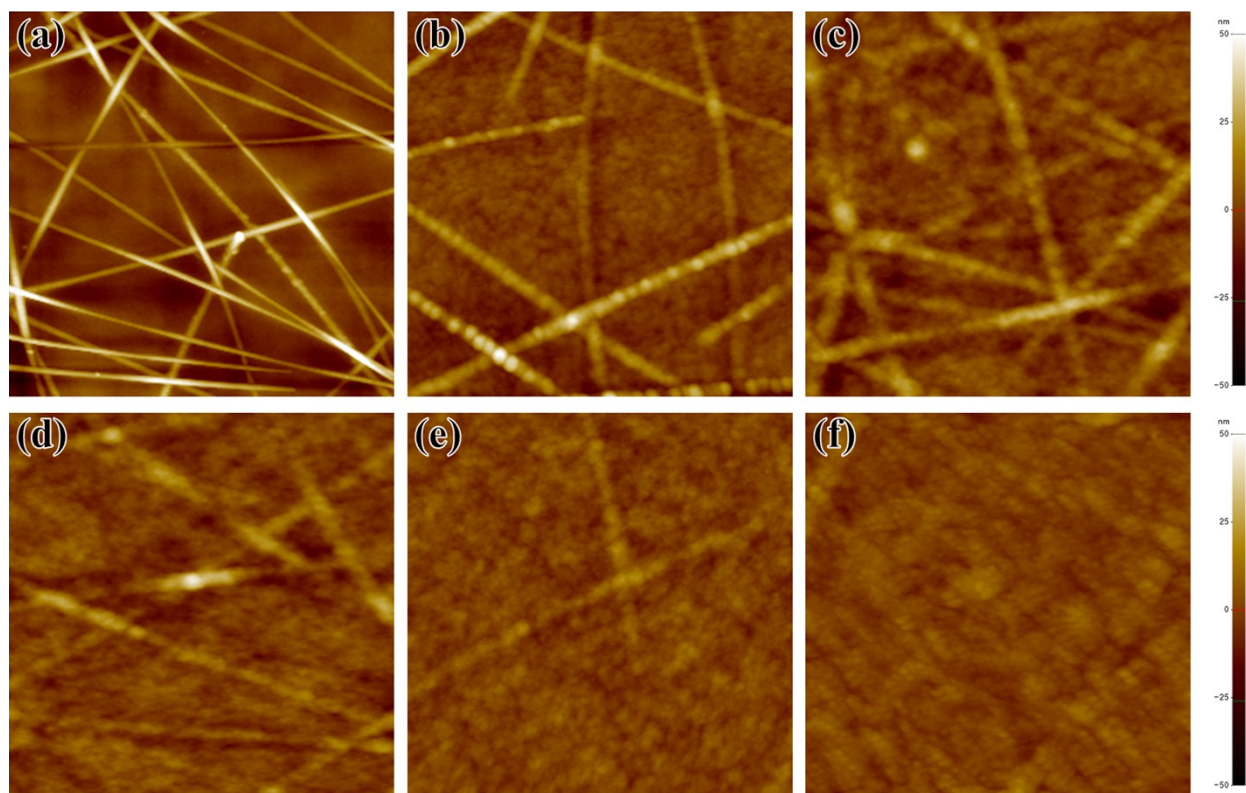

**Fig. S4** AFM topographies of (a) AgNW and AgNW-parylene C TEs with various thickness of parylene C protection layers (b) 25nm, (c) 50nm, (d) 100nm, (e) 150nm, and (f) 200nm.

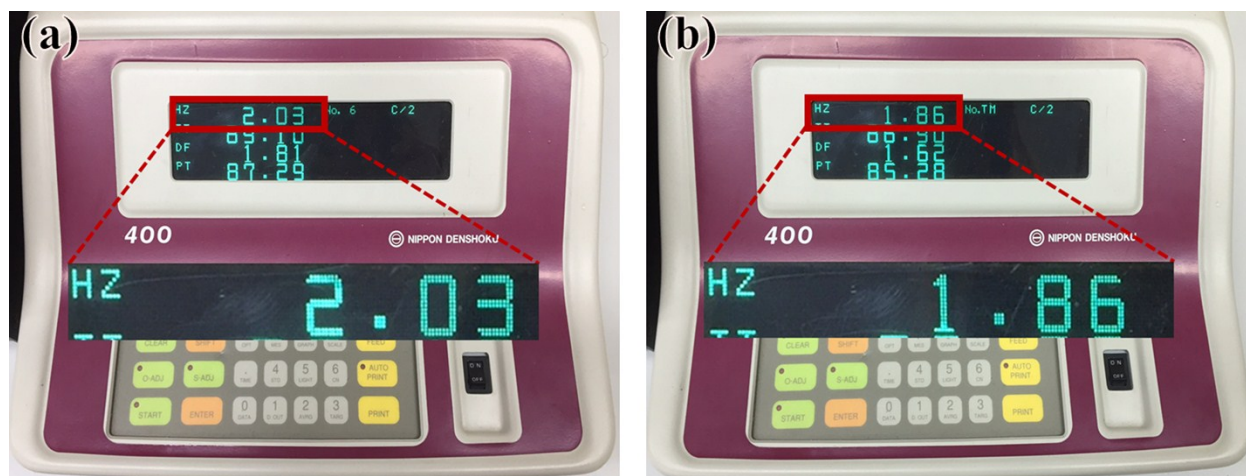

**Fig. S5** Haze test of (a) AgNW/PET and (b) AgNW-Parylene C/PET TEs.

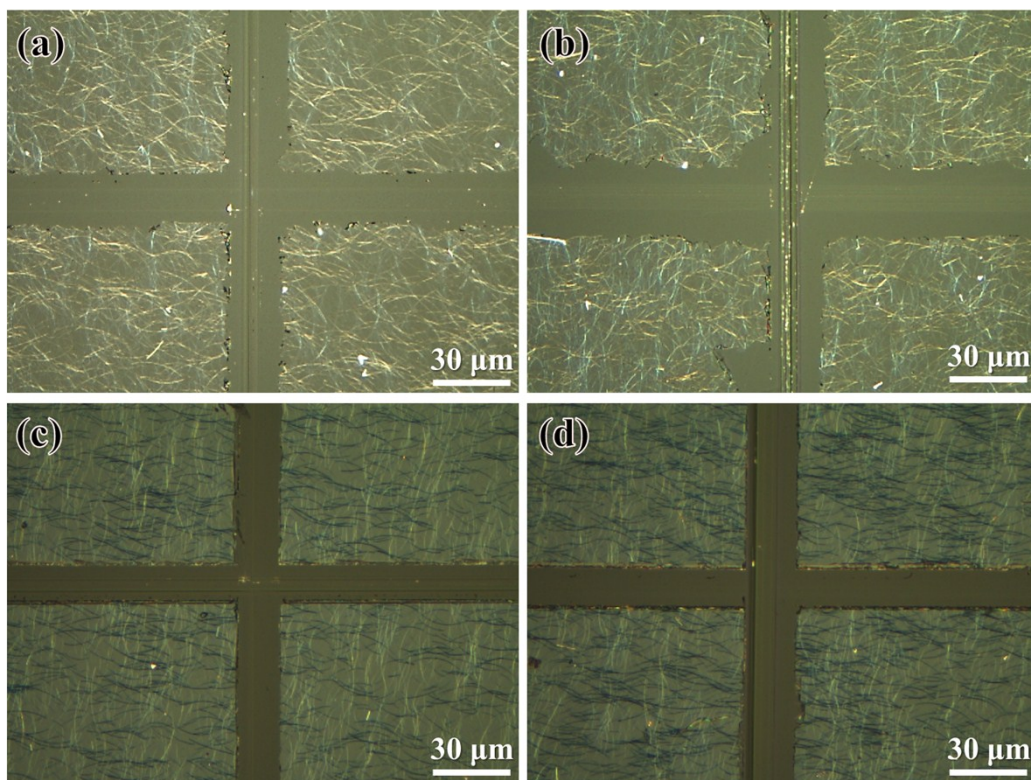

**Fig. S6** OM images of (a), (b) AgNW and (c), (d) AgNW –parylene C TEs which have the square lattice patterns before and after cross-cut test with a 3M scotch tape.

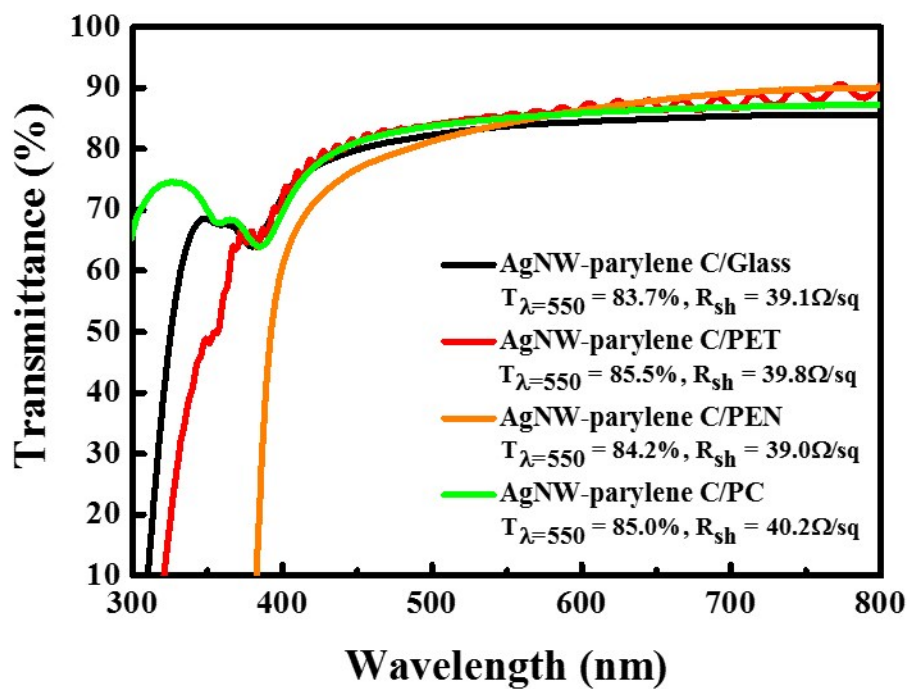

**Fig. S7** Optical transmittance spectra and sheet resistance values of AgNW-parylene C TEs prepared onto various substrates such as glass, PET, PEN, and PC.

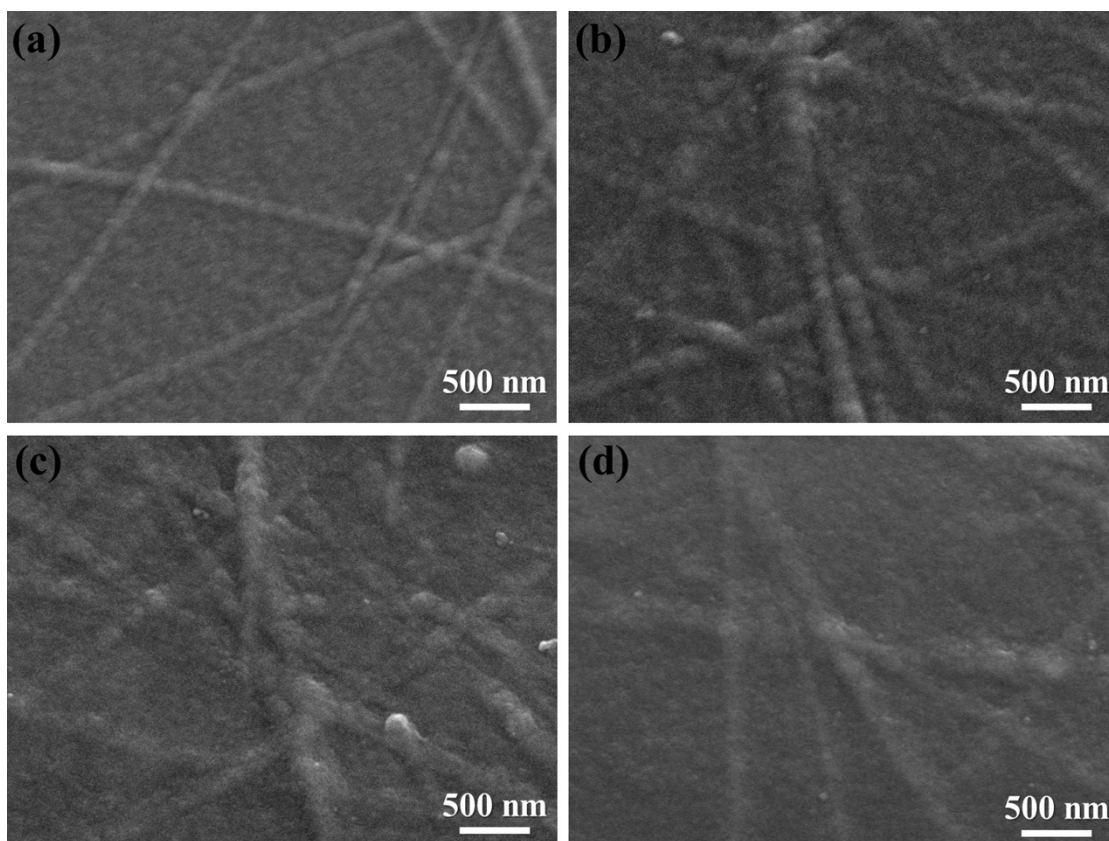

**Fig. S8** SEM images of (a) AgNW-parylene C 50nm, (b) AgNW-parylene C 100nm, (c) AgNW-parylene C 150nm, and (d) AgNW-parylene C 200nm TEs after the long-term stability test at 70 °C and 70% RH.

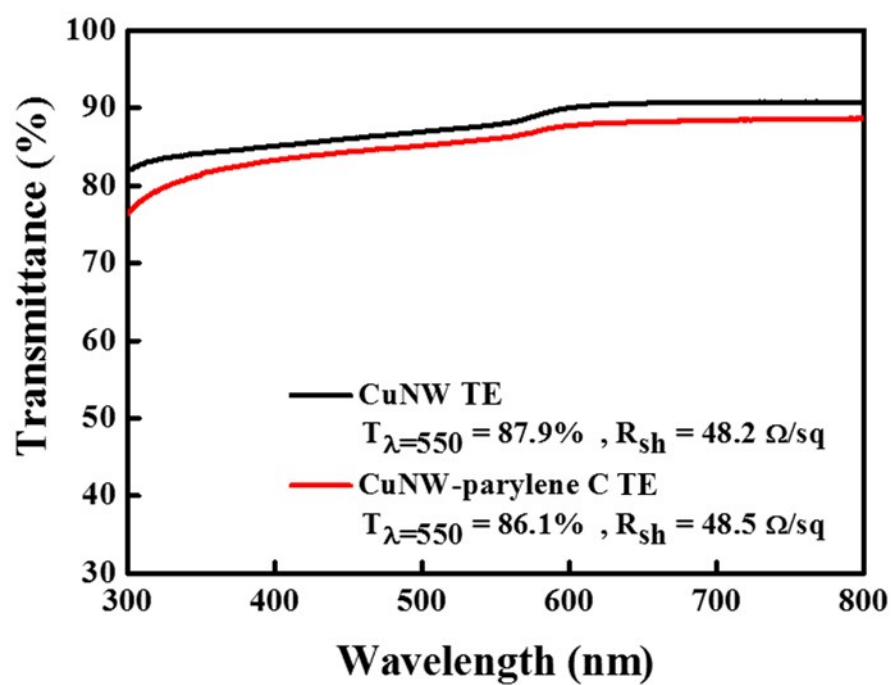

**Fig. S9** Optical transmittance spectra and sheet resistance values of CuNW and CuNW-parylene C TEs.

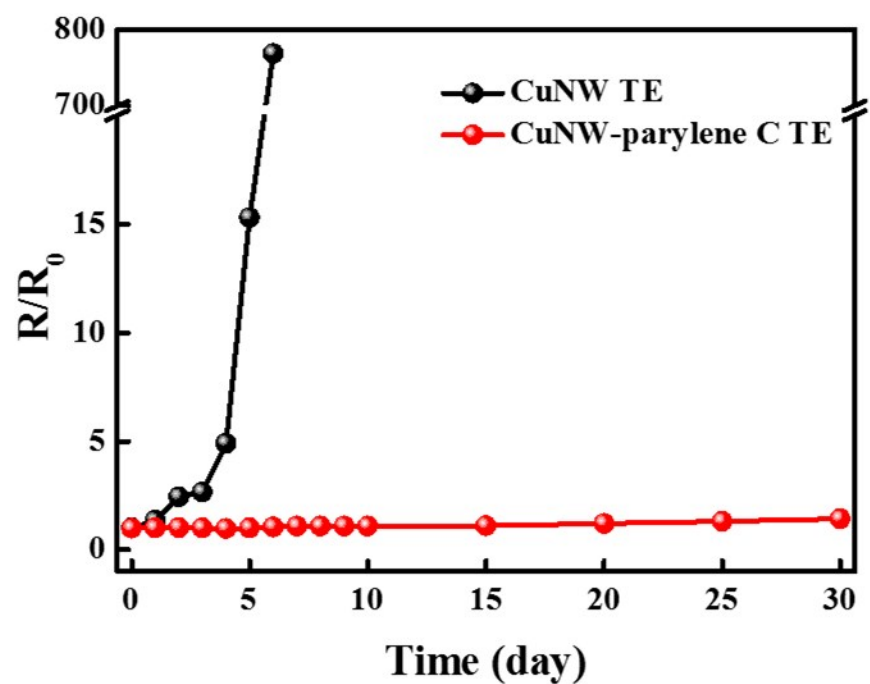

**Fig. S10** Sheet resistance change of CuNW and CuNW-parylene C TEs during the long-term stability test at ambient condition for 30 days.

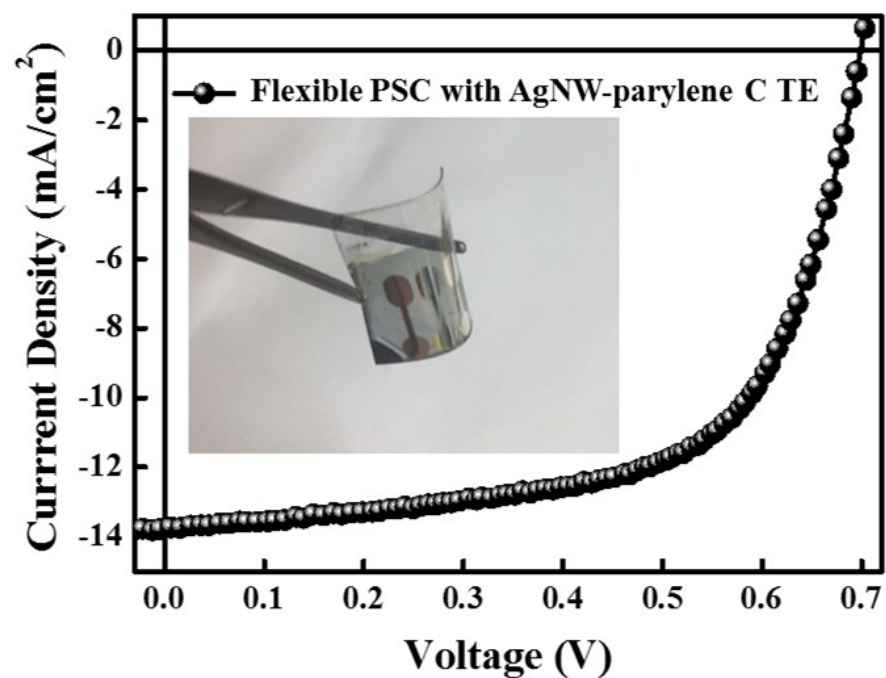

**Fig. S11** Current density–voltage ( $J$ – $V$ ) characteristics of flexible bulk heterojunction (BHJ) polymer solar cell with AgNW-parylene C/PET TE. The inset shows the photograph of the flexible BHJ PSC with AgNW-parylene C/PET TE.
